# Supplementary material for: Monodispersed mesoporous Li4Ti5O12 submicrospheres as anode materials for lithium-ion batteries: morphology and electrochemical performances
Source: Royal Society of Chemistry journal article supplement (doi:10.1039/c4nr00960f), 2014-01-01
Supplement: c4nr00960f1.pdf [file c4nr00960f1.pdf]

# Supporting Information

## **Monodispersed mesoporous $\text{Li}_4\text{Ti}_5\text{O}_{12}$ submicrospheres as anode materials for lithium-ion batteries: morphology and electrochemical performances**

Chunfu Lin<sup>a</sup>, Xiaoyong Fan<sup>a</sup>, Yuelong Xin<sup>b</sup>, Fuquan Cheng<sup>b</sup>, Man On Lai<sup>a</sup>, Henghui Zhou<sup>\*b</sup>, Li Lu<sup>\*a</sup>

<sup>a</sup> *Department of Mechanical Engineering, National University of Singapore, 9 Engineering Drive 1, Singapore 117576, Singapore*

<sup>b</sup> *College of Chemistry and Molecular Engineering, Peking University, Beijing 100871, PR China.*

*\* Corresponding authors. Tel.: +65 65162236; fax: +65 67791459. E-mail address: luli@nus.edu.sg (L. Lu). Tel.: +86 10 62757908; fax: +86 10 62757908. E-mail address: hhzhou@pku.edu.cn (H. Zhou).*

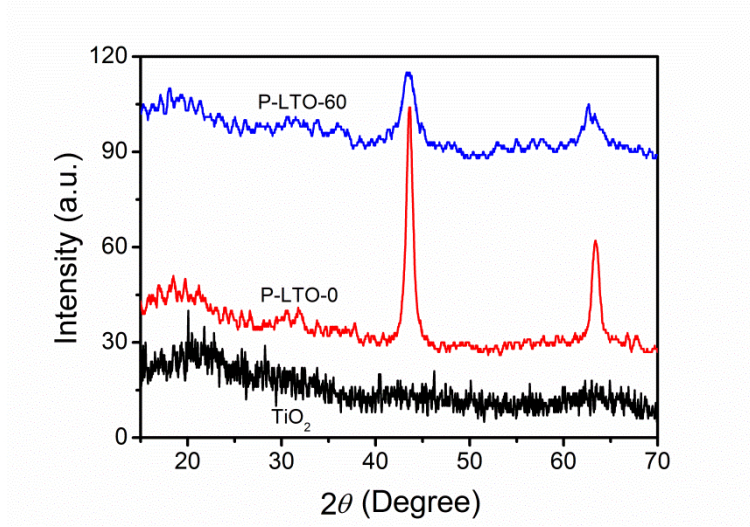

Fig. S1. XRD spectra of precursor  $\text{TiO}_2$  submicrospheres and the samples after the solvothermal process (P-LTO-0 and P-LTO-60).

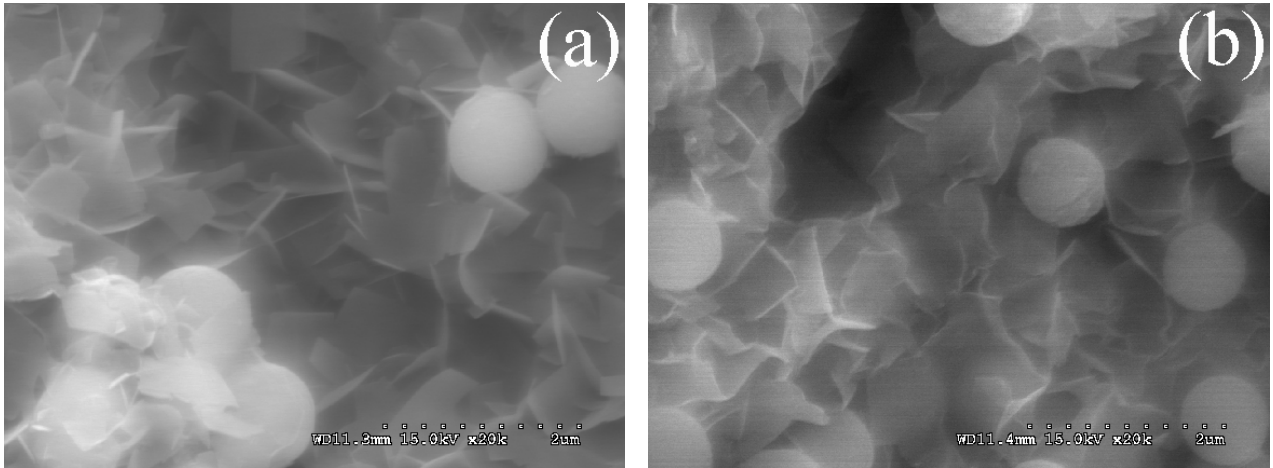

Fig. S2. FESEM images of (a) P-LTO-30 and (b) LTO-30-500.

The chemical reactions of the solvothermal process and the sintering process in Fig. 2 can be expressed as Eq. (S1) through Eq. (S3).

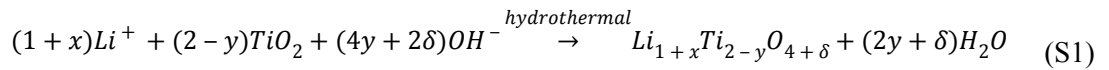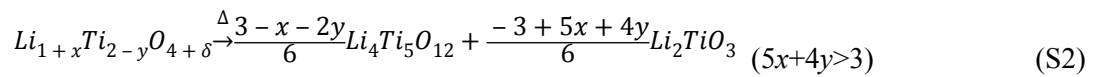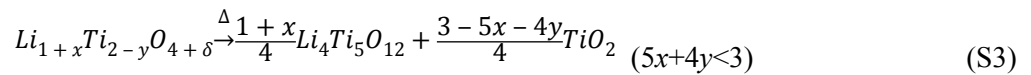

$$(1+x-4y=2\delta)$$

Li<sup>+</sup> ion diffusion coefficient  $D$  can be calculated from the EIS plots in the low frequency region based on Eq. S4 and Eq. S5 [7,8].

$$Z' = R_{\Omega} + R_{ct} + \sigma_w \omega^{-0.5} \quad (\text{S4})$$

$$D = R^2 T^2 / (2 A^2 F^4 \sigma_w^2 C_{Li^+}^2) \quad (\text{S5})$$

where  $Z'$  is the real part of the impedance,  $\sigma_w$ , the Warburg impedance coefficient,  $\omega$ , the angular frequency,  $R$ , the gas constant,  $T$ , the absolute temperature,  $A$ , the surface area,  $F$ , the Faraday's constant, and  $C_{Li^+}$ , the molar concentration of Li<sup>+</sup> ions.
